# Supplementary material for: An off–on fluorescence aptasensor for trace thrombin detection based on FRET between CdS QDs and AuNPs
Source: Royal Society of Chemistry journal article supplement (doi:10.1039/d2ra06891e), 2022-01-01
Supplement: d2ra06891e1.pdf [file d2ra06891e1.pdf]

### Supplementary information

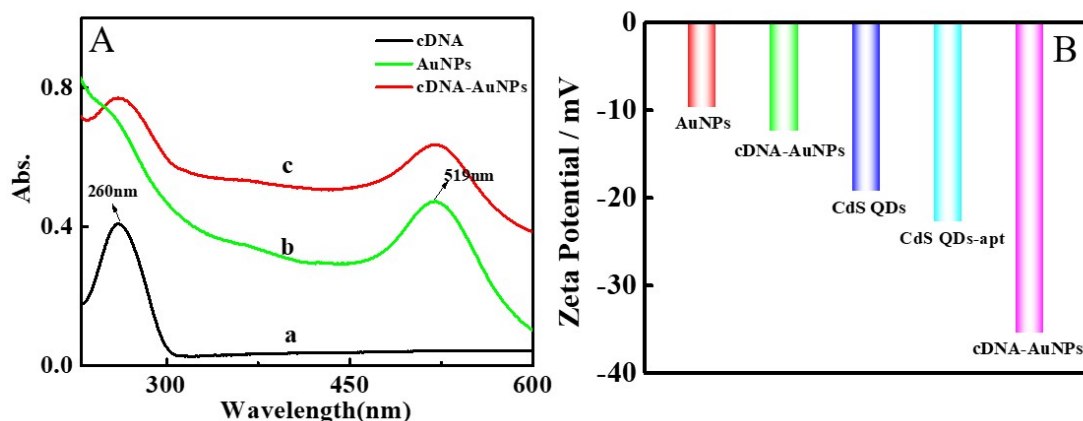

**Fig S1.** (A) UV-vis absorption spectra of (a) free cDNA, (b) AuNPs, (c) cDNA-AuNPs. (B) Zeta potential of CdS QDs, CdS QDs-apt, AuNPs and cDNA-AuNPs.

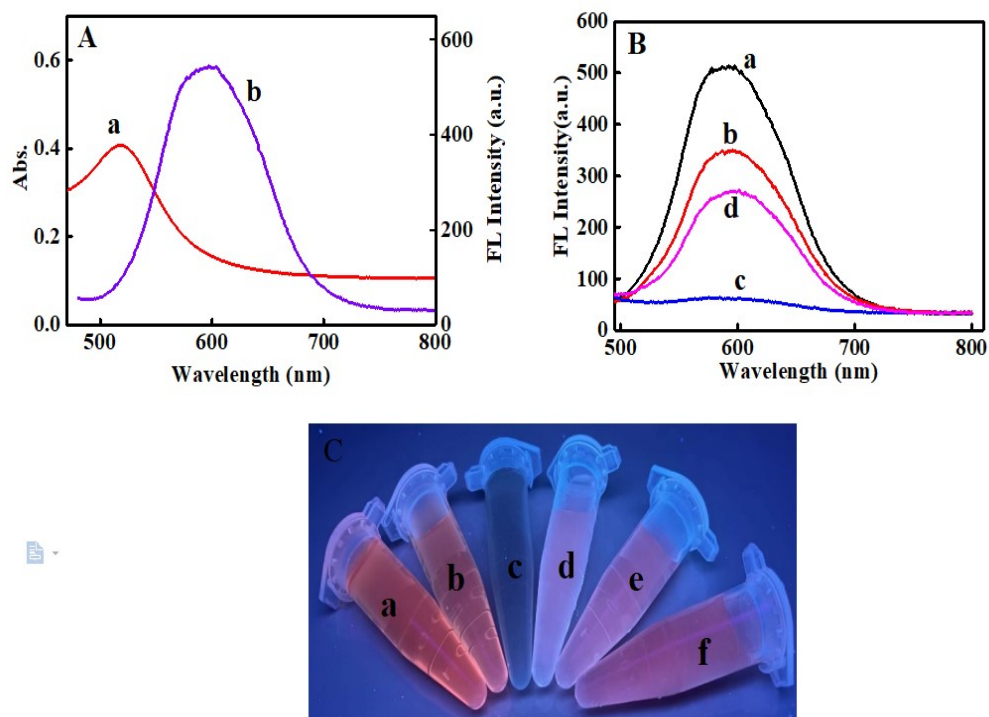

**Fig S2.** (A) UV-vis absorption spectrum of AuNPs (a) and fluorescence spectra of CdS QDs (b). (B) Fluorescence spectra of (a) CdS QDs (b) CdS QDs-AuNPs (c) CdS QDs-apt/cDNA-AuNPs (d) CdS QDs-apt/cDNA-AuNPs@TB. (C) Photographs of the luminescence in each step by shining a UV lamp (a) CdS QDs (b) CdS QDs-AuNPs (c) CdS QDs-apt/cDNA-AuNPs (d) CdS QDs-apt/cDNA-AuNPs@TB (1.35 nmol/L) (e) CdS QDs-apt/cDNA-AuNPs@TB (13.5 nmol/L) (f) CdS QDs-apt/cDNA-AuNPs@TB (27.0 nmol/L).

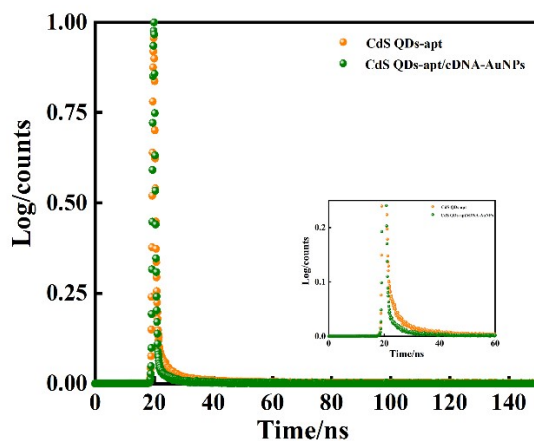

**Fig. S3.** The luminescence time decay resolution curves of CdS QDs-apt in the absence and presence of cDNA-AuNPs.

**Table 1.** Fluorescence emission lifetimes/ns ( $\tau$ ) and fractional amplitudes (A) of CdS QDs-apt in the absence and presence of cDNA-AuNPs.

| Fluorescent material<br>( $\lambda_{ex}=445$ nm)   | lifetime $\tau$ /ns and fractional<br>amplitudes (A) | Average life time/ns |
|----------------------------------------------------|------------------------------------------------------|----------------------|
| CdS QDs-apt<br>( $\lambda_{em}=593$ nm)            | $\tau_1=0.48(72.46\%)$                               | $\tau_{avg}=3.82$    |
|                                                    | $\tau_2=4.32(17.00\%)$                               |                      |
|                                                    | $\tau_3=25.97(10.55\%)$                              |                      |
|                                                    | $\chi^2=1.162$                                       |                      |
| CdS QDs-apt/cDNA-AuNPs<br>( $\lambda_{em}=593$ nm) | $\tau_1=0.38(88.72\%)$                               | $\tau_{avg}=1.63$    |
|                                                    | $\tau_2=4.66(7.11\%)$                                |                      |
|                                                    | $\tau_3=23.03(4.17\%)$                               |                      |
|                                                    | $\chi^2=0.943$                                       |                      |

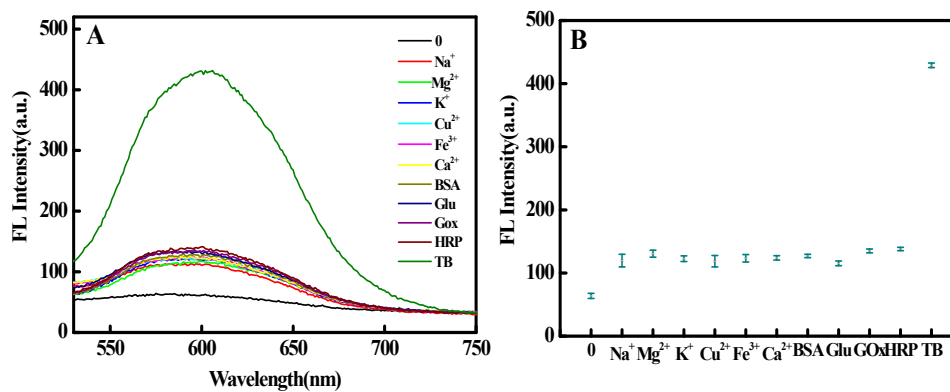

Fi

**g. S4.** The fluorescence intensity of TB and interfering substances added to fluorescent probes. (B) The fluorescence intensity was measured in parallel for three times.
